# Supplementary material
Source: ML conference proceedings conference paper supplement (https://openreview.net/forum?id=0c2SbGJ3Lt)
Supplement: supplementary_material [file attachment]

## A APPENDIX

### A.1 BASELINES

**AV-cPCFG:** We train compound probabilistic context free grammar (cPCFG) (Kim et al., 2019a) on word-level discrete speech tokens. Similar to AV-NSL, word segments are obtained from VG-HuBERT with segment insertion, and segment representations are extracted from VG-HuBERT layer 10 with CLS attention weighted mean-pool. Different from AV-NSL, the segment representations are discretized via kmeans to obtain word-level discrete indices. Because the discretization is word-level instead of phone-level, we swept the number of kmeans cluster over  $\{1k, 2k, 4k, 8k, 12k, 16k, 20k\}$ , which corresponds to the dictionary size in cPCFG. In summary, AV-cPCFG leverages visual cues only for segmentation and segment representations, but not for phrase structure induction.

**DPDP-cPCFG:** Instead of training cPCFG on audio-visual word segments and audio-visual segment representations, DPDP-cPCFG does not rely on any visual grounding throughout. Instead, DPDP (Kamper, 2022), a recent speech-only word segmentation algorithm, and vanilla HuBERT representations mean-pooled over DPDP segments are used. We swept through HuBERT layer  $\{2, 4, 6, 8, 10, 12\}$ . As in AV-cPCFG, kmeans is used for word-level discretization.

**oracle AV-NSL:** To remove the uncertainty of unsupervised word segmentation, we directly train AV-NSL on top of oracle word segmentation via force alignment. The segment representations are based on learnable attention pooling over vanilla HuBERT layer  $\{2, 4, 6, 8, 10, 12\}$  representations. We also tried log Mel spectrograms and HuBERT-L 300M to examine the effectiveness of different input representations. One note is that simpler *score* and *combine* parametrization suffices here<sup>6</sup>.

### A.2 HYPERPARAMETERS

For VG-HuBERT, we run MBR selection on the combination of insertion gap  $\{0.1, 0.2, 0.3\}$  seconds, segmentation layer  $\{9, 10, 11\}$ , attention magnitude threshold at top  $\{30\%, 20\%, 10\%\}$ , three training random seeds, and model snapshots at training step 20k, 30k, 40k, 50k, 60k. This gives 405 combinations in total.

### A.3 FULL RESULTS TABLE

### A.4 WORD SEGMENTATION VIZ

We show more examples of word segmentation generated by our improved VG-HuBERT in Figure 4. Segments marked with “+” are inserted segments, and vertical blue dotted lines are inferred word boundaries.

### A.5 VISUALIZATION OF INDUCED TREES

We visualize the induced trees in Figure 5.

<sup>6</sup>We found that for oracle AV-NSL, the original *score* and *combine* parametrization in VG-NSL works better.

| Model            |                             |                                            | Output     | SAIoU        |
|------------------|-----------------------------|--------------------------------------------|------------|--------------|
| Syntax Induction | Segmentation                | Seg. Representation (continuous/discrete)  | Selection  |              |
| Right-Branching  | VG-HuBERT+MBR <sub>10</sub> |                                            |            | <b>0.546</b> |
| Right-Branching  | DPDP                        |                                            |            | 0.478        |
| AV-NSL           | VG-HuBERT+MBR <sub>10</sub> | VG-HuBERT <sub>10</sub> (continuous)       | MBR        | 0.516        |
| AV-NSL           | VG-HuBERT+MBR <sub>10</sub> | VG-HuBERT <sub>11</sub> (continuous)       | MBR        | 0.498        |
| AV-NSL           | VG-HuBERT+MBR <sub>10</sub> | VG-HuBERT <sub>12</sub> (continuous)       | MBR        | 0.492        |
| AV-NSL           | VG-HuBERT+MBR <sub>10</sub> | VG-HuBERT <sub>10,11,12</sub> (continuous) | MBR        | <b>0.521</b> |
| AV-cPCFG         | VG-HuBERT+MBR <sub>10</sub> | VG-HuBERT <sub>10</sub> +1k km (discrete)  | last ckpt. | 0.454        |
| AV-cPCFG         | VG-HuBERT+MBR <sub>10</sub> | VG-HuBERT <sub>10</sub> +2k km (discrete)  | last ckpt. | 0.444        |
| AV-cPCFG         | VG-HuBERT+MBR <sub>10</sub> | VG-HuBERT <sub>10</sub> +4k km (discrete)  | last ckpt. | 0.499        |
| AV-cPCFG         | VG-HuBERT+MBR <sub>10</sub> | VG-HuBERT <sub>10</sub> +8k km (discrete)  | last ckpt. | 0.481        |
| AV-cPCFG         | VG-HuBERT+MBR <sub>10</sub> | VG-HuBERT <sub>10</sub> +12k km (discrete) | last ckpt. | 0.473        |
| AV-cPCFG         | VG-HuBERT+MBR <sub>10</sub> | VG-HuBERT <sub>10</sub> +16k km (discrete) | last ckpt. | 0.471        |
| AV-cPCFG         | VG-HuBERT+MBR <sub>10</sub> | VG-HuBERT <sub>10</sub> +20k km (discrete) | last ckpt. | 0.454        |
| DPDP-cPCFG       | DPDP                        | HuBERT <sub>2</sub> +1k km (discrete)      | last ckpt. | 0.434        |
| DPDP-cPCFG       | DPDP                        | HuBERT <sub>2</sub> +2k km (discrete)      | last ckpt. | 0.465        |
| DPDP-cPCFG       | DPDP                        | HuBERT <sub>2</sub> +4k km (discrete)      | last ckpt. | 0.444        |
| DPDP-cPCFG       | DPDP                        | HuBERT <sub>2</sub> +8k km (discrete)      | last ckpt. | 0.387        |
| DPDP-cPCFG       | DPDP                        | HuBERT <sub>2</sub> +12k km (discrete)     | last ckpt. | 0.447        |
| DPDP-cPCFG       | DPDP                        | HuBERT <sub>2</sub> +16k km (discrete)     | last ckpt. | 0.360        |
| DPDP-cPCFG       | DPDP                        | HuBERT <sub>10</sub> +1k km (discrete)     | last ckpt. | 0.403        |
| DPDP-cPCFG       | DPDP                        | HuBERT <sub>10</sub> +2k km (discrete)     | last ckpt. | 0.426        |
| DPDP-cPCFG       | DPDP                        | HuBERT <sub>10</sub> +4k km (discrete)     | last ckpt. | 0.415        |
| DPDP-cPCFG       | DPDP                        | HuBERT <sub>10</sub> +8k km (discrete)     | last ckpt. | 0.367        |
| DPDP-cPCFG       | DPDP                        | HuBERT <sub>10</sub> +12k km (discrete)    | last ckpt. | 0.415        |
| DPDP-cPCFG       | DPDP                        | HuBERT <sub>10</sub> +16k km (discrete)    | last ckpt. | 0.414        |

Table 7: Fully-unsupervised phrase structure induction results evaluated with SAIoU.

| Model     | Segmentation                | Seg. Representation             | tree target |        |        | Output Selection | SAIoU        |
|-----------|-----------------------------|---------------------------------|-------------|--------|--------|------------------|--------------|
|           |                             |                                 | train       | val    | test   |                  |              |
| s-Benepar | VG-HuBERT+MBR <sub>10</sub> | HuBERT <sub>2</sub>             | AV-NSL      | AV-NSL | oracle | last ckpt.       | <b>0.538</b> |
| s-Benepar | VG-HuBERT+MBR <sub>10</sub> | HuBERT <sub>4</sub>             | AV-NSL      | AV-NSL | oracle | last ckpt.       | 0.536        |
| s-Benepar | VG-HuBERT+MBR <sub>10</sub> | HuBERT <sub>6</sub>             | AV-NSL      | AV-NSL | oracle | last ckpt.       | <b>0.538</b> |
| s-Benepar | VG-HuBERT+MBR <sub>10</sub> | HuBERT <sub>8</sub>             | AV-NSL      | AV-NSL | oracle | last ckpt.       | 0.532        |
| s-Benepar | VG-HuBERT+MBR <sub>10</sub> | HuBERT <sub>10</sub>            | AV-NSL      | AV-NSL | oracle | last ckpt.       | 0.537        |
| s-Benepar | VG-HuBERT+MBR <sub>10</sub> | HuBERT <sub>12</sub>            | AV-NSL      | AV-NSL | oracle | last ckpt.       | 0.536        |
| s-Benepar | VG-HuBERT+MBR <sub>10</sub> | HuBERT <sub>2,4,6,8,10,12</sub> | AV-NSL      | AV-NSL | oracle | MBR              | 0.536        |

Table 8: Self-training results evaluated with SAIoU.

| Syntax Induction   | Model        |                                    | Output Selection | $F_1$        |
|--------------------|--------------|------------------------------------|------------------|--------------|
|                    | Segmentation | Seg. Representation                |                  |              |
| Random             | oracle       |                                    |                  | 32.77        |
| Left-Branching     | oracle       |                                    |                  | 24.56        |
| Right-Branching    | oracle       |                                    |                  | <b>57.39</b> |
| VG-NSL             |              | word embeddings                    | Supervised       | 53.11        |
| AV-NSL             | oracle       | log-Mel spectrogram                | Supervised       | 42.01        |
| AV-NSL             | oracle       | HuBERT <sub>2</sub>                | Supervised       | 55.51        |
| AV-NSL             | oracle       | HuBERT-L <sub>24</sub>             | Supervised       | 54.63        |
| AV-NSL             | oracle       | HuBERT <sub>2</sub>                | MBR              | 54.99        |
| AV-NSL             | oracle       | HuBERT <sub>4</sub>                | MBR              | 53.25        |
| AV-NSL             | oracle       | HuBERT <sub>6</sub>                | MBR              | 53.46        |
| AV-NSL             | oracle       | HuBERT <sub>8</sub>                | MBR              | 53.14        |
| AV-NSL             | oracle       | HuBERT <sub>10</sub>               | MBR              | 36.67        |
| AV-NSL             | oracle       | HuBERT <sub>12</sub>               | MBR              | 48.51        |
| AV-NSL             | oracle       | HuBERT-L <sub>24</sub>             | MBR              | 54.39        |
| AV-NSL             | oracle       | HuBERT <sub>2,4,6,8,10,12</sub>    | MBR              | 55.56        |
| AV-NSL             | oracle       | HuBERT <sub>2,4,6,8,10,12,24</sub> | MBR              | <b>55.96</b> |
| AV-NSL → s-Benepar | oracle       | HuBERT <sub>2</sub>                | MBR              | 57.24        |
| AV-NSL → s-Benepar | oracle       | HuBERT <sub>4</sub>                | MBR              | 57.08        |
| AV-NSL → s-Benepar | oracle       | HuBERT <sub>6</sub>                | MBR              | 56.81        |
| AV-NSL → s-Benepar | oracle       | HuBERT <sub>8</sub>                | MBR              | 56.94        |
| AV-NSL → s-Benepar | oracle       | HuBERT <sub>10</sub>               | MBR              | 57.16        |
| AV-NSL → s-Benepar | oracle       | HuBERT <sub>12</sub>               | MBR              | <b>57.33</b> |

Table 9: Phrase structure induction with oracle segmentation given results evaluated with  $F_1$ .

| Model                                        | $F_1$       | Constituent Recall |             |             |             |
|----------------------------------------------|-------------|--------------------|-------------|-------------|-------------|
|                                              |             | NP                 | VP          | PP          | ADJP        |
| VG-NSL (Shi et al., 2019)                    | 50.4        | <b>79.6</b>        | 26.2        | 42.0        | 22.0        |
| VG-NSL + HI                                  | 53.3        | 74.6               | 32.5        | 66.5        | 21.7        |
| VG-NSL + HI + FastText                       | 54.4        | 78.8               | 24.4        | 65.6        | 22.0        |
| AV-NSL (oracle seg. + HuBERT <sub>2</sub> )  | <b>55.6</b> | 55.5               | <b>68.1</b> | <b>66.6</b> | 22.1        |
| AV-NSL (oracle seg. + HuBERT <sub>4</sub> )  | 53.7        | 57.4               | 56.8        | 61.3        | 21.3        |
| AV-NSL (oracle seg. + HuBERT <sub>6</sub> )  | 53.9        | 59.4               | 55.4        | 59.3        | 21.2        |
| AV-NSL (oracle seg. + HuBERT <sub>8</sub> )  | 53.9        | 56.0               | 58.0        | 64.9        | <b>22.5</b> |
| AV-NSL (oracle seg. + HuBERT <sub>10</sub> ) | 50.6        | 55.8               | 48.1        | 57.0        | 20.5        |
| AV-NSL (oracle seg. + HuBERT <sub>12</sub> ) | 49.0        | 62.5               | 34.4        | 45.0        | 17.4        |

Table 10: Recall of specific typed phrases, and overall  $F_1$  score, evaluated on the SpokenCOCO test split. VG-NSL numbers are taken directly from (Shi et al., 2019). AV-NSL here are trained on oracle segmentation with vanilla HuBERT as the layer representations.

| Syntax Induction | Model        |                      | Visual Embedding | $F_1$ |
|------------------|--------------|----------------------|------------------|-------|
|                  | Segmentation | Seg. Representation  |                  |       |
| AV-NSL           | oracle       | HuBERT <sub>2</sub>  | ResNet101        | 55.51 |
| AV-NSL           | uniform      | HuBERT <sub>2</sub>  | ResNet101        | 48.97 |
| AV-NSL           | oracle       | HuBERT <sub>10</sub> | ResNet101        | 50.50 |
| AV-NSL           | uniform      | HuBERT <sub>10</sub> | ResNet101        | 36.62 |
| AV-NSL           | oracle       | HuBERT <sub>2</sub>  | DINO             | 55.71 |
| AV-NSL           | oracle       | HuBERT <sub>2</sub>  | random           | 31.23 |

Table 11: Top rows: Impact of segmentation quality for AV-NSL with number of words segments known in advance. Bottom rows: Impact of visual embedding for AV-NSL

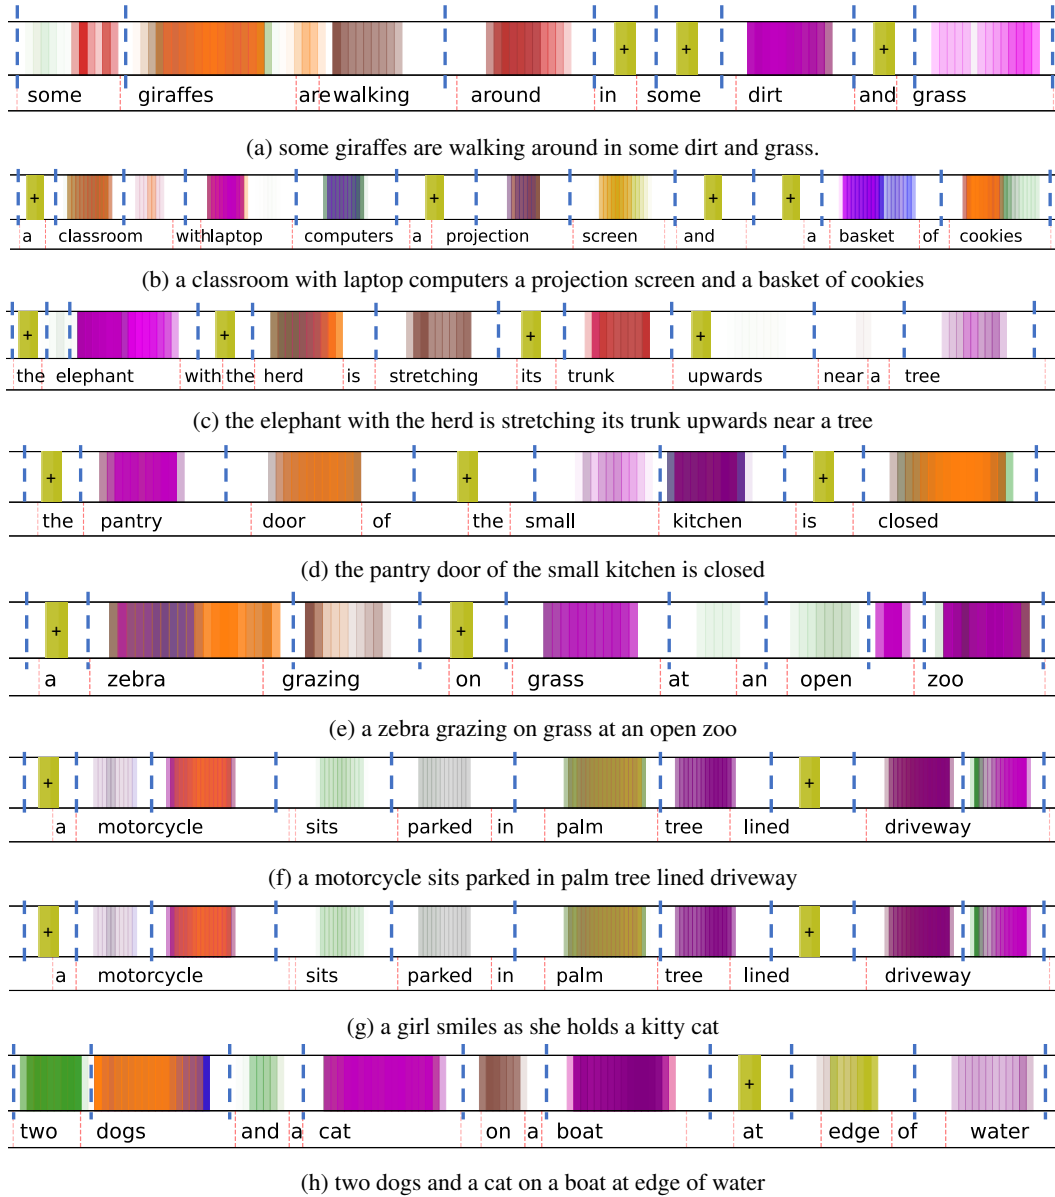

Figure 4: Examples of attention segments generated by VG-HuBERT. Inserted segments are marked with “+”. Vertical blue dotted lines are inferred word boundaries.

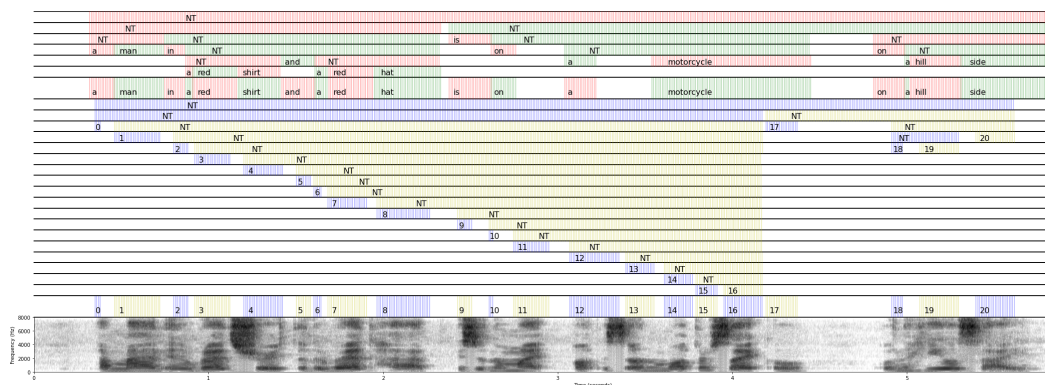

Figure 5: Visualization of an example produced by AV-NSL (best viewed in color). Top (red and green): the ground-truth parse tree; bottom (blue and yellow): the generated parse tree. In each tree, a parent segment adjacently covers its two children segments.
